# Supplementary material for: Blood pressure, brain lesions and cognitive decline in patients with atrial fibrillation
Source: Frontiers journal article supplement (doi:10.3389/fcvm.2024.1449506), 2024-09-03
Supplement: Data_Sheet_1.PDF [file Data_Sheet_1.PDF]

# BLOOD PRESSURE, BRAIN LESIONS AND COGNITIVE DECLINE IN PATIENTS WITH ATRIAL FIBRILLATION

## BASELINE

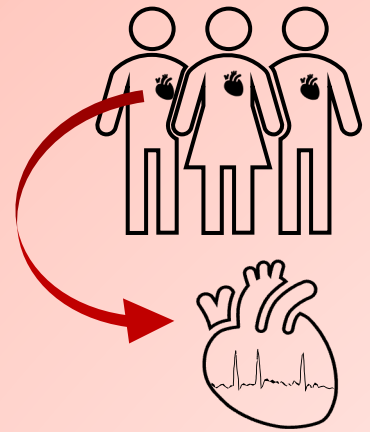

- 1213 patients with AF
- Mean age 71 years
- 74% male

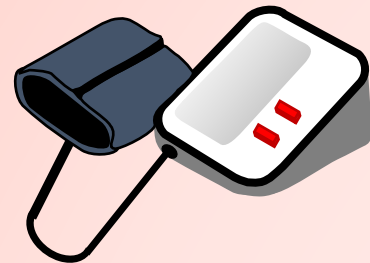

- Mean BP 135/79 mmHg
- History of hypertension 68%
- Antihypertensive therapy 97%

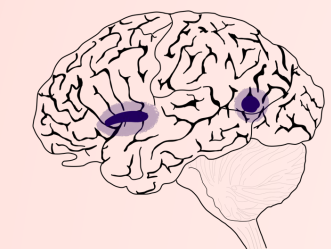

- Ischemic lesions 35%
- White Matter Lesions 99%
- Microbleeds 20%

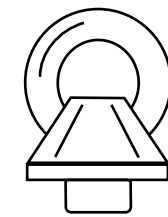

**Standardized brain MRI**  
At baseline and after 2 years

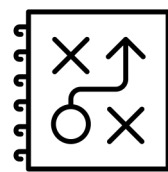

**Standardized cognitive testing**  
Yearly

## NEW BRAIN LESIONS

- Follow-up time: 2 years
- New Ischemic lesions 5.4%
- New White Matter Lesions 18.4%
- New Microbleeds 11.5%

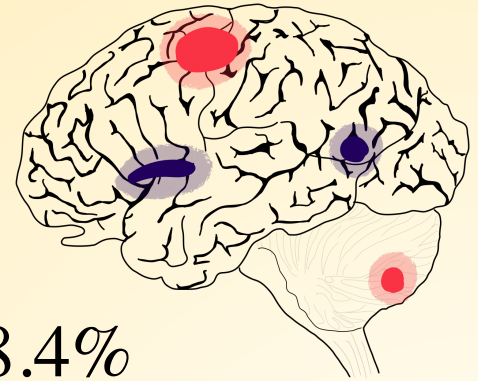

**No evidence for an association between BP and new brain lesions after 2 years**

## COGNITIVE DECLINE

- Median Follow-up time: 6 years

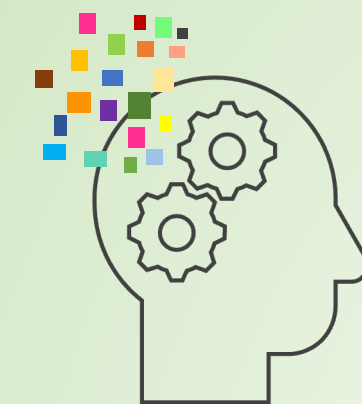

**BP was not consistently associated with cognitive decline**

AF = Atrial Fibrillation

BP = Blood Pressure

MRI = Magnetic Resonance Imaging
